# Supplementary material for: Development and validation of routine clinical laboratory data derived marker-based nomograms for the prediction of 5-year graft survival in kidney transplant recipients
Source: publisher site journal article supplement (doi:10.18632/aging.202748), 2021-03-26
Supplement: Supplementary file [file aging-v13i7-202748-supplementary-material-SD1.pdf]

**SUPPLEMENTARY FIGURES**

**1. Clinical variables**

**A Age (years)**

Optimal cutoff value = 35  
 HR (< 35)=2.27

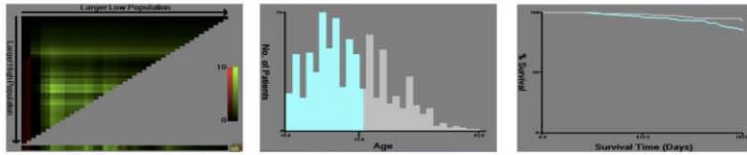

**B Hospitalization time (days)**

Optimal cutoff value = 34  
 HR (>34)=1.47

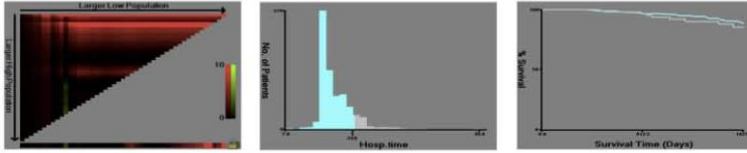

**C BMI (kg/m²)**

Optimal cutoff value = 25.3  
 HR (>25.3)=2.63

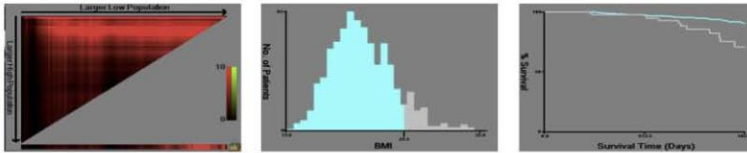

**2. Laboratory indexes within 6 months after KT**

**A TAC-TTR (%)**

Optimal cutoff value = 58.3  
 HR (<58.3)=1.98

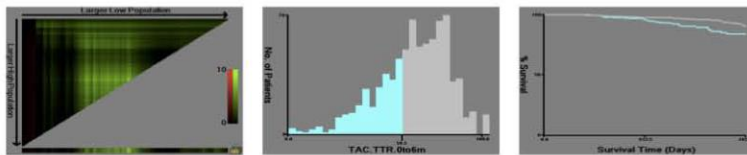

**B eGFR-Mean (mL/min/1.73m²)**

Optimal cutoff value = 58.4  
 HR (<58.4)=2.58

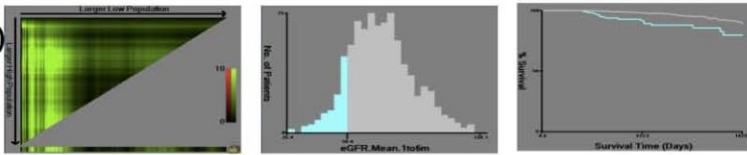

**C eGFR-CV (%)**

Optimal cutoff value = 13.7  
 HR (>13.7)=2.45

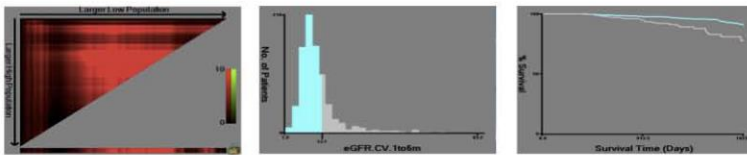

**D Uric acid-Mean (umol/L)**

Optimal cutoff value = 357.8  
 HR (>357.8)=1.8

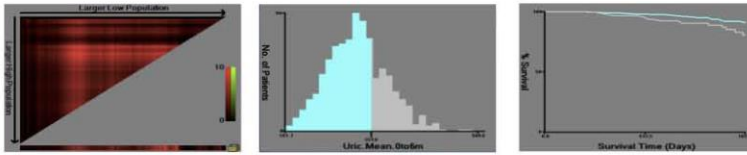

**E WBC-Mean (10<sup>9</sup>/L)**

Optimal cutoff value = 5.9  
 HR (>5.9)=3.09

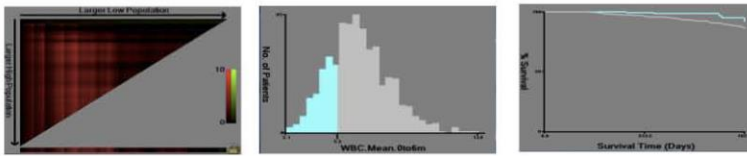

**F Lymphocyte-Mean (%)**  
 Optimal cutoff value =29.7  
 HR (<29.7)=2.77

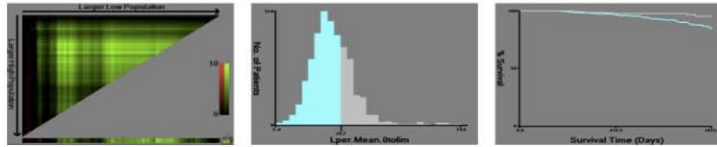

**G Neutrophil-Mean (%)**  
 Optimal cutoff value = 60.8  
 HR (>60.8)=3.48

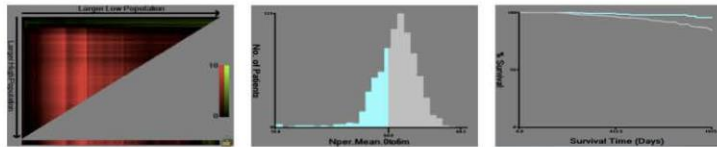

**H Neutrophil-Mean (10<sup>9</sup>/L)**  
 Optimal cutoff value = 4.7  
 HR (>4.7)=2.64

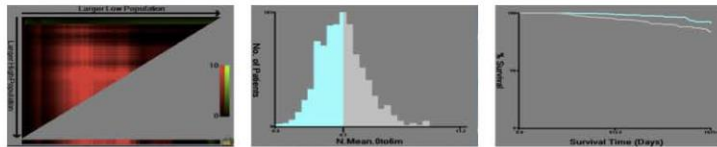

**I NLR-Mean**  
 Optimal cutoff value = 2.7  
 HR (>2.7)=2.4

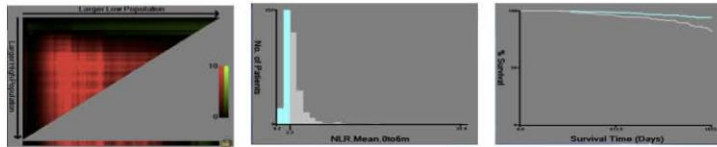

### 3. Laboratory indexes within 12 months after KT

**A TAC-CV (%)**  
 Optimal cutoff value = 49.8  
 HR (>49.8)=2.53

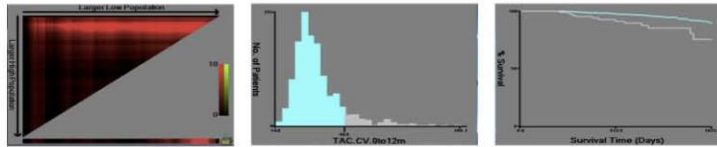

**B TAC-TTR (%)**  
 Optimal cutoff value = 59.6  
 HR (<59.6)=1.98

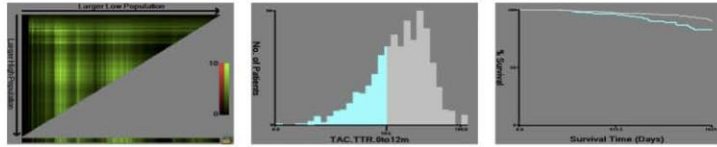

**C TAC-IoLL (%)**  
 Optimal cutoff value = 48.5  
 HR (>48.5)=2.24

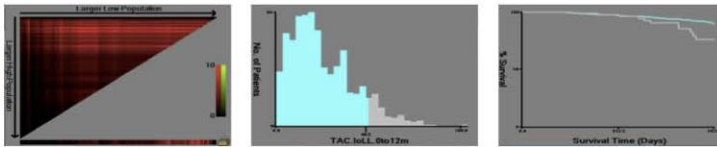

**D eGFR-Mean (mL/min/1.73m<sup>2</sup>)**  
 Optimal cutoff value = 59.1  
 HR (<59.1)=4.68

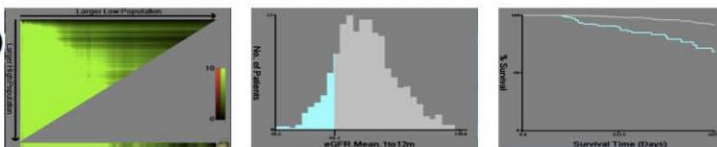

**E eGFR-CV (%)**  
 Optimal cutoff value = 16.6  
 HR (>16.6)=5.03

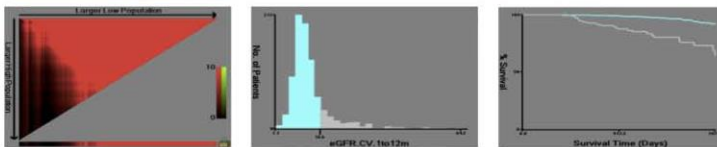

**F Uric acid-Mean (umol/L)**  
 Optimal cutoff value = 380.1  
 HR (>380.1)=1.93

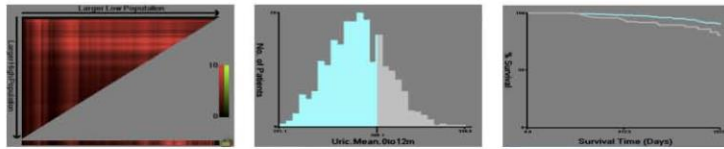

**G RBC-Mean (10<sup>12</sup>/L)**  
 Optimal cutoff value = 4.3  
 HR (<4.3)=1.72

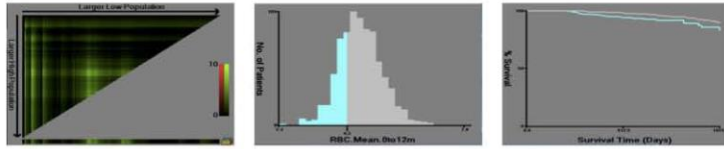

**H HCT-Mean**  
 Optimal cutoff value = 0.41  
 HR (<0.41)=1.95

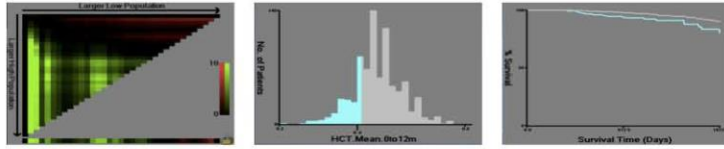

**I WBC-Mean (10<sup>9</sup>/L)**  
 Optimal cutoff value = 8.1  
 HR (>8.1)=1.87

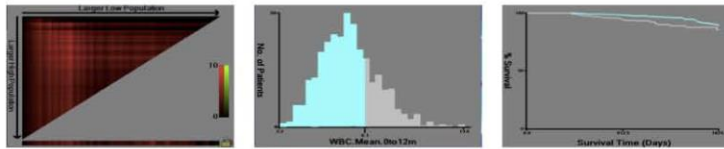

**J Lymphocyte-Mean (10<sup>9</sup>/L)**  
 Optimal cutoff value = 1.6  
 HR (<1.6)=1.75

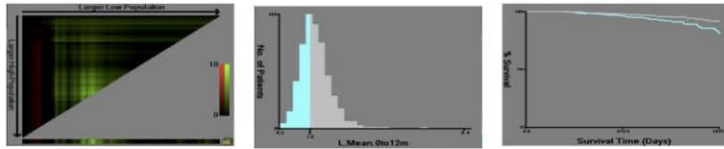

**K Neutrophil-Mean (10<sup>9</sup>/L)**  
 Optimal cutoff value = 6.2  
 HR (>6.2)=3.07

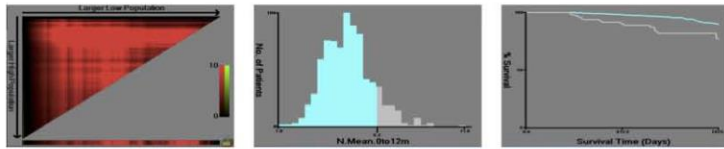

**L NLR-Mean**  
 Optimal cutoff value = 4.8  
 HR (>4.8)=2.79

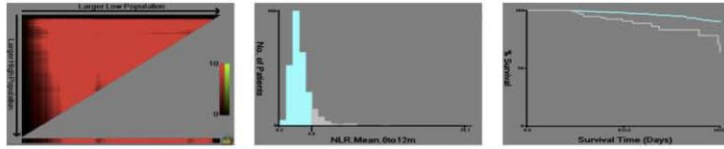

**M PLR-Mean**  
 Optimal cutoff value = 115.6  
 HR (>115.6)=1.88

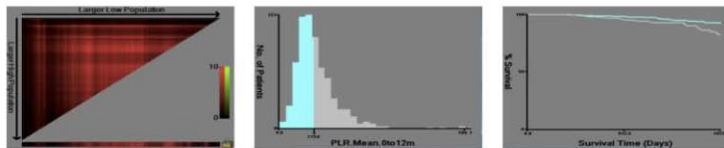

**N MLR-Mean (%)**  
 Optimal cutoff value = 27.3  
 HR (>27.3)=1.77

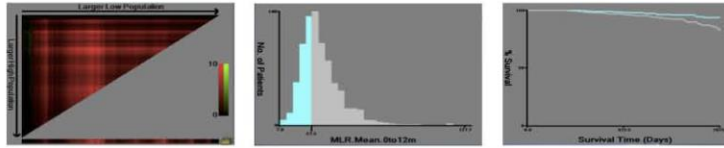

**Supplementary Figure 1.** Determination of optimal cut-off values for clinical and laboratory variables whose *P* values less than 0.15 in univariate Cox analysis.

## A Training cohort

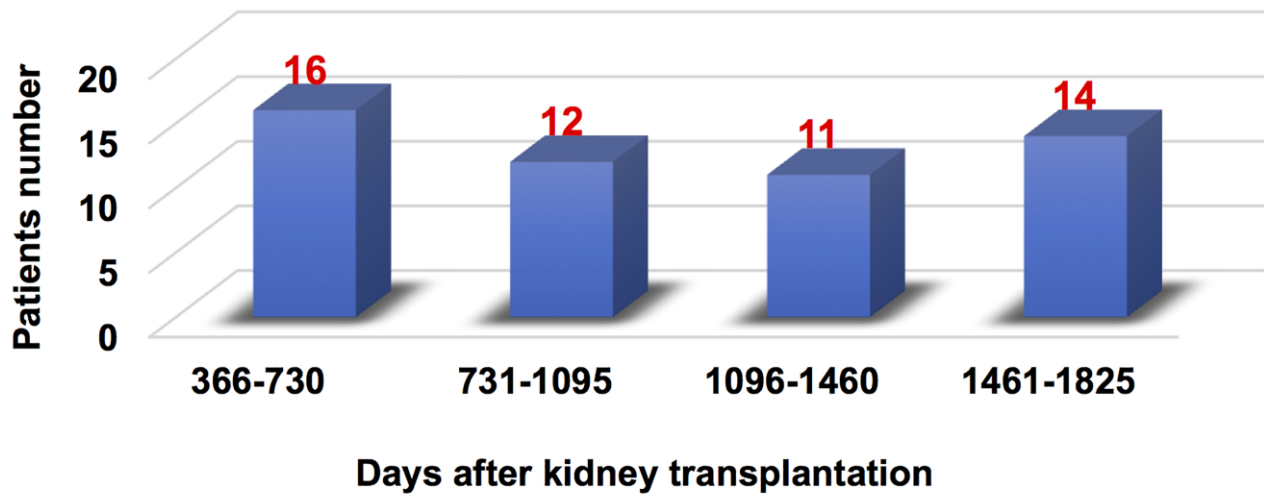

## B Validation set

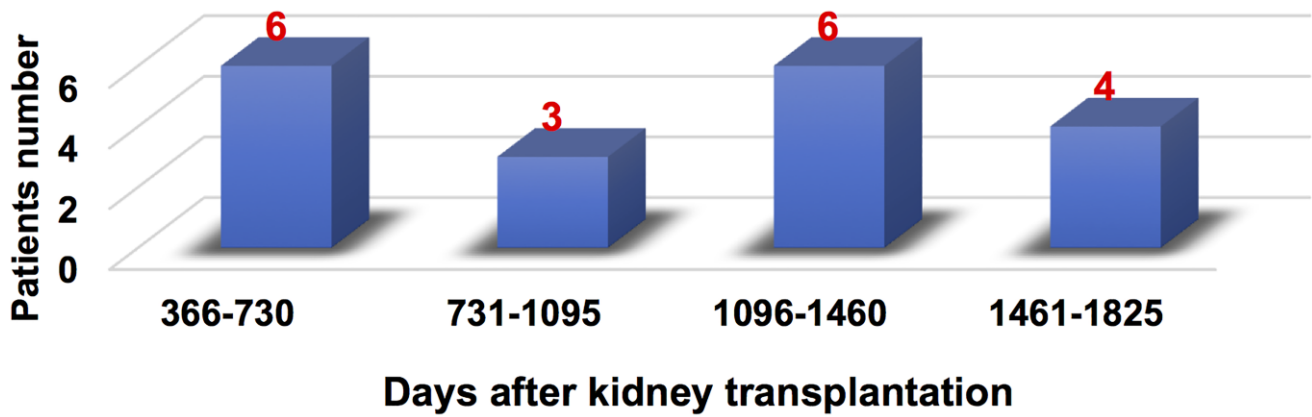

Supplementary Figure 2. Time point distribution of occurring graft loss in training (A) and validation (B) cohorts.

| Laboratory indexes calculators for predicting 5-year graft survival in kidney transplant recipients (Results region) |                       |                                        |                                          |                                                     |                                              |
|----------------------------------------------------------------------------------------------------------------------|-----------------------|----------------------------------------|------------------------------------------|-----------------------------------------------------|----------------------------------------------|
| BMI                                                                                                                  | TAC-CV                | eGFR-CV                                | Neutrophil (%) -Mean                     | Lymphocyte absolute numer (10 <sup>9</sup> /L)-Mean |                                              |
| BMI (kg/m <sup>2</sup> )                                                                                             | TAC-CV (%)            | eGFR-CV (%)                            | Neutrophil (%) -Mean                     | Lymphocyte (abs)-Mean                               |                                              |
| 19.53125                                                                                                             | 20.24440825           | 11.86930454                            | 68.06666667                              | 0.866666667                                         |                                              |
|                                                                                                                      | TAC-Mean (ng/mL)      | eGFR-Mean (mL/min/1.73m <sup>2</sup> ) | Neutrophil (%) -times                    | Lymphocyte (abs)-times                              |                                              |
|                                                                                                                      | 6.1                   | 108.3908428                            | 3                                        | 3                                                   |                                              |
|                                                                                                                      | TAC-SD                | eGFR-SD                                |                                          |                                                     |                                              |
|                                                                                                                      | 1.234908904           | 12.86523923                            |                                          |                                                     |                                              |
|                                                                                                                      | TAC-times             | eGFR-times                             |                                          |                                                     |                                              |
|                                                                                                                      | 5                     | 5                                      |                                          |                                                     |                                              |
| Note: enter your original laboratory values into pink boxes (Input region)                                           |                       |                                        |                                          |                                                     |                                              |
| Height (cm)                                                                                                          | TAC C0 values (ng/mL) | Gender (M/F)                           | Age (years)                              | Neutrophil (%) values                               | Lymphocyte (abs) values (10 <sup>9</sup> /L) |
| 160                                                                                                                  | 5.7                   | M                                      | 30                                       | 73.6                                                | 0.64                                         |
| Weight (kg)                                                                                                          |                       | Scr values (μmol/L)                    | eGFR levels (mL/min/1.73m <sup>2</sup> ) |                                                     |                                              |
| 50                                                                                                                   | 4.6                   |                                        | 117.8579954                              | 63.1                                                | 0.81                                         |
|                                                                                                                      | 5.9                   | 78                                     | 117.2425342                              | 67.5                                                | 1.15                                         |
|                                                                                                                      | 6.3                   | 79                                     | 89.05857488                              |                                                     |                                              |
|                                                                                                                      | 8                     | 100                                    | 116.6379685                              |                                                     |                                              |
|                                                                                                                      |                       | 80                                     | 101.1571412                              |                                                     |                                              |
|                                                                                                                      |                       | 90                                     | #NUM!                                    |                                                     |                                              |
|                                                                                                                      |                       |                                        | #NUM!                                    |                                                     |                                              |
|                                                                                                                      |                       |                                        | #NUM!                                    |                                                     |                                              |
|                                                                                                                      |                       |                                        | #NUM!                                    |                                                     |                                              |
|                                                                                                                      |                       |                                        | #NUM!                                    |                                                     |                                              |
|                                                                                                                      |                       |                                        | #NUM!                                    |                                                     |                                              |
|                                                                                                                      |                       |                                        | #NUM!                                    |                                                     |                                              |
|                                                                                                                      |                       |                                        | #NUM!                                    |                                                     |                                              |
|                                                                                                                      |                       |                                        | #NUM!                                    |                                                     |                                              |
|                                                                                                                      |                       |                                        | #NUM!                                    |                                                     |                                              |

**Supplementary Figure 3.** Interface example of laboratory indexes calculator for the calculation of predictors for predicting 5-year graft survival in KTRs. Please visit website [https://docs.google.com/spreadsheets/d/1IJX9YZBTON1xwVrNyp5PzcNpWQ1CitGm-N\\_nDOKxbpk/edit?pli=1#gid=0](https://docs.google.com/spreadsheets/d/1IJX9YZBTON1xwVrNyp5PzcNpWQ1CitGm-N_nDOKxbpk/edit?pli=1#gid=0).
